# Supplementary material for: TRB3 links insulin/IGF to tumour promotion by interacting with p62 and impeding autophagic/proteasomal degradations
Source: PubMed Central journal article supplement (PMC4557121; doi:10.1038/ncomms8951), 2015-08-13
Supplement: ncomms8951-s1.pdf [file ncomms8951-s1.pdf]

**Fig-S1 (Hu)**

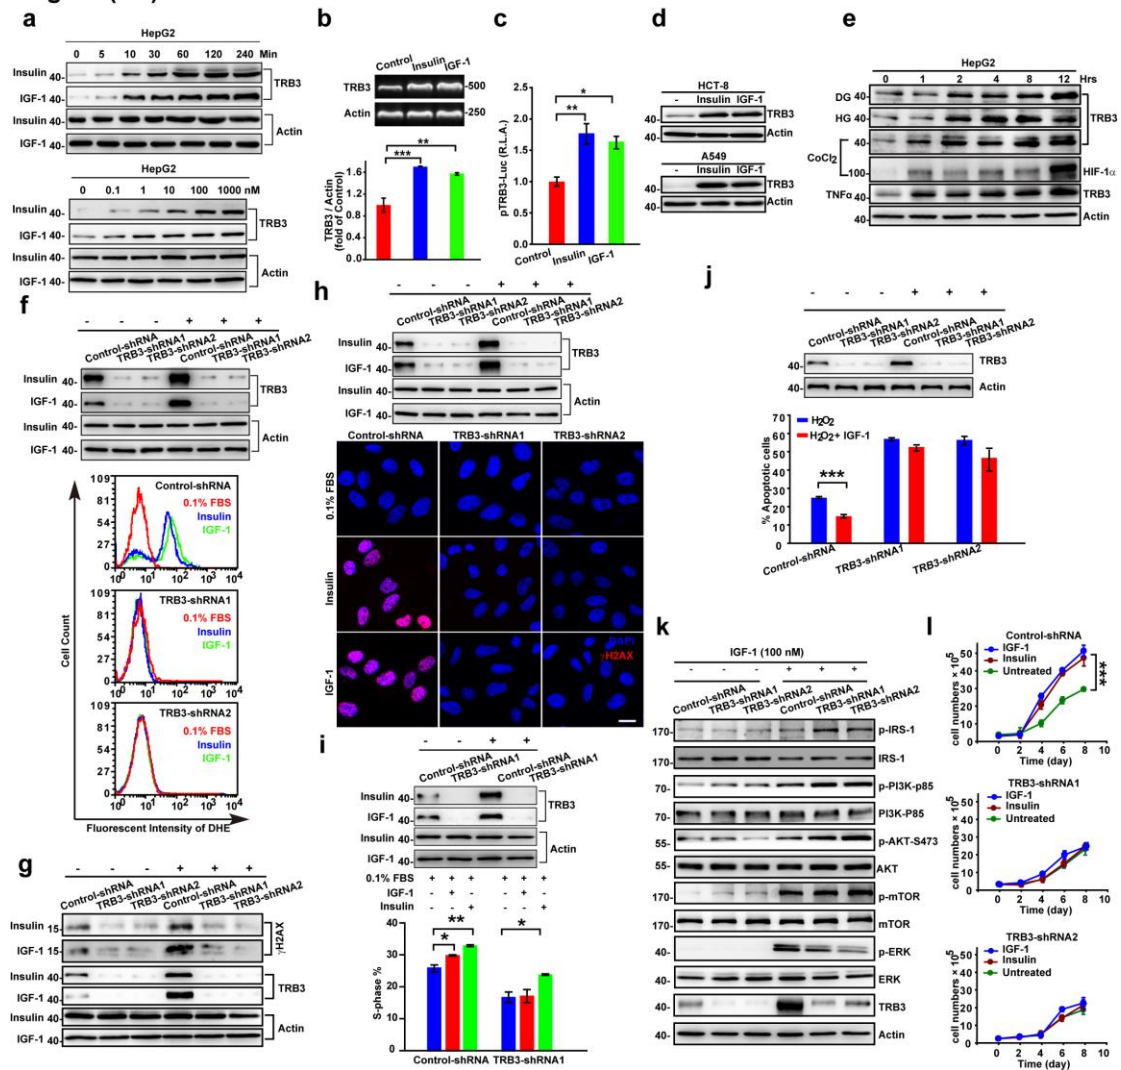

**Supplementary Figure 1. Metabolic stress induced TRB3 mediates the cancer-promoting roles.** (a) HepG2 cells were treated with insulin/IGF-1 (100 nM) for indicated times (upper) or treated with insulin/IGF-1 at different concentrations for 12 hours. The expression of TRB3 was detected with immunoblotting. Data are representative immunoblots of 5 independent assays. (b) HepG2 cells were treated with insulin (100 nM) or IGF-1 (100 nM) for 12 hours. RT-PCR analysis was carried out to determine the mRNA level of TRB3 and  $\beta$ -actin. Data are mean  $\pm$  s.e.m. of 3 independent assays with triplicates. (c) HepG2 cells were transfected with pTRB3-luc plasmid for 24

hours. The cells were treated with insulin (100 nM) or IGF-1 (100 nM) for another 12 hours and the luciferase activity was measured. Data are mean  $\pm$  s.e.m. of 5 independent assays with triplicates. **(d)** HCT-8 or A549 cells were treated with insulin (100 nM)/IGF-1 (100 nM) for 4 hours. The TRB3 levels were determined with immunoblot ( $n=5$  independent assays). **(e)** HepG2 cells were treated with glucose deprivation (DG), high glucose (HG, 50 mM),  $\text{CoCl}_2$  (200  $\mu\text{M}$ ) and  $\text{TNF}\alpha$  (50  $\text{ng ml}^{-1}$ ) for indicated time points respectively. TRB3 levels were determined with immunoblot analysis ( $n=5$  independent assays). **(f)** TRB3 depletion suppressed insulin/IGF-1-induced ROS generation. ROS was determined with Dihydroethidium (DHE, 10  $\mu\text{M}$ ) staining followed with flow cytometry ( $n=5$  independent assays). **(g,h)** TRB3 depletion attenuated insulin/IGF-1-induced DNA damage. The expression of  $\gamma\text{H2AX}$  was evaluated with immunoblotting (g) or immuno-fluorescence staining (h), scale bar, 18.75  $\mu\text{m}$ ,  $n=5$  independent assays. **(i)** TRB3 depletion decreased the S-phase fraction and inhibited the insulin/IGF-induced prolongation of S-phase. Data are mean  $\pm$  s.e.m. of 3 independent assays with triplicates. **(j)** TRB3 depletion increased sensitivity of cancer cells to hydrogen peroxide-induced apoptosis. Data are mean  $\pm$  s.e.m. of 3 independent assays with triplicates. **(k)** HepG2 cells were treated with or without IGF-1 for 30 min and expressions of indicated proteins were detected with immunoblotting ( $n=5$  independent assays). **(l)** Depletion of TRB3 inhibited insulin/IGF-1-induced proliferation of cancer cells. Data are mean  $\pm$  s.e.m. of 3 independent assays with triplicates.

Statistical significance was determined by Student's *t*-test; \**P*<0.05; \*\**P*<0.01; \*\*\**P*<0.001.

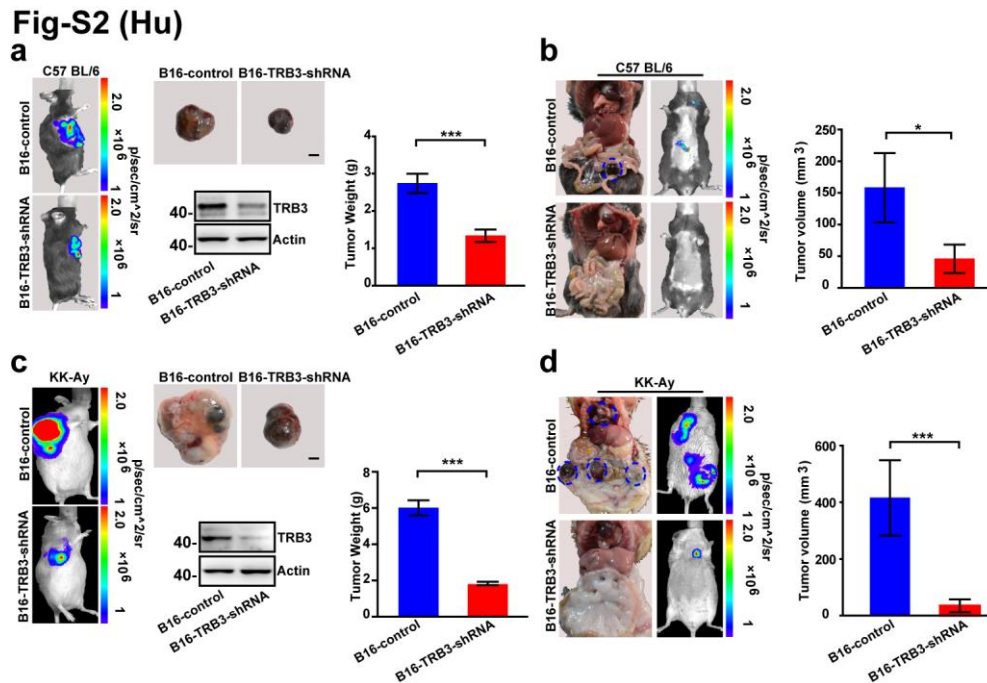

**Supplementary Figure 2. TRB3 depletion in tumor cells displays much prominent antitumour effects in diabetic KK-Ay mice than that in C57BL/6 mice.** (a) C57 BL/6 mice were s.c. inoculated with B16-F10 cells expressing control-shRNA or TRB3-shRNA ( $1.5 \times 10^5$ ). Data are representative bioluminescence images and tumours along with quantified tumour weight. The levels of TRB3 were also shown in B16-F10 cells expressing control-shRNA or TRB3-shRNA. Scale bar, 1.5 cm,  $n=8$  per group. (b) C57 BL/6 mice were *i.v.* injected with B16-F10 cells expressing control-shRNA or TRB3-shRNA ( $3 \times 10^5$ ). Data are bioluminescence images with total tumour volumes at multiple metastatic sites (mean  $\pm$  s.e.m.;  $n=8$  per group). (c) KK-Ay T2D mice were s.c. inoculated with B16-F10 cells expressing control-shRNA or

TRB3-shRNA ( $1.5 \times 10^5$ ). Data are representative bioluminescence images and tumours along with quantified tumour weight. The levels of TRB3 were also shown in B16-F10 cells expressing control-shRNA or TRB3-shRNA. Scale bar, 1.5 cm,  $n=8$  per group. (d) KK-Ay T2D mice were *i.v.* injected with B16-F10 cells expressing control-shRNA or TRB3-shRNA ( $3 \times 10^5$ ). Data are bioluminescence images with total tumour volumes at multiple metastatic sites (mean  $\pm$  s.e.m.;  $n=8$  per group). Statistical significance was determined with Student's *t*-test; \* $P < 0.05$ , \*\*\* $P < 0.001$ .

**Fig-S3 (Hu)**

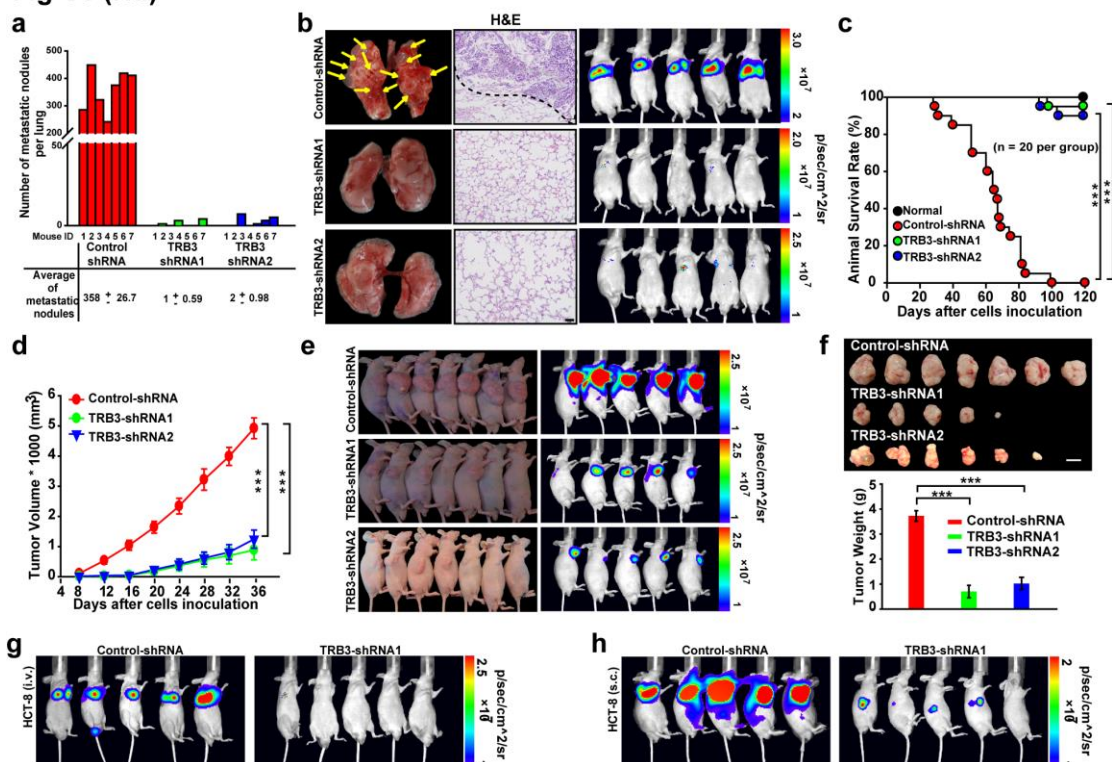

**Supplementary Figure 3. TRB3 depletion protects against tumour metastasis and growth. (a,b)** BALB/c nude mice were *i.v.* injected with HepG2 cells expressing control-shRNA, TRB3-shRNA1 or TRB3-shRNA2

( $3 \times 10^6$ ). *In vivo* imaging system was used to detect tumour metastasis. Data are number of metastases in lungs (a). Representative graphs of lungs, H&E stained lung sections and bioluminescence imaging (b). Metastatic nodules were indicated by arrows. Scale bar, 5  $\mu\text{m}$ ,  $n=10$  per group. (c) Kaplan-Meier survival curve for mice harboring tumours expressing control-shRNA or one of the two shRNAs targeting TRB3 ( $n=20$  per group). Statistical significance was determined by Kaplan-Meier log-rank test;  $***P < 0.001$ . (d) HepG2 cells expressing control-shRNA, TRB3-shRNA1 or TRB3-shRNA2 ( $1.5 \times 10^6$ ) were s.c. injected into the right flank of the BALB/c nude mice. Data are mean volumes  $\pm$  s.e.m. at indicated times and photographs of representative mice ( $n=10$  per group). (e,f) Data are photographs of representative mice (e), and tumours along with quantified tumour weight (f). Scale bar, 1.5 cm,  $n=10$  per group. (g,h) BALB/c nude mice were *i.v.* ( $3 \times 10^6$ ) or *s.c.* ( $1.5 \times 10^6$ ) injected with HCT-8 cells expressing control-shRNA or TRB3-shRNA1. *In vivo* imaging system was used to detect tumour metastasis and growth. Data are representative bio-photonic images of animals with metastasis (g) and growth (h) ( $n=6$  per group). Statistical significance was determined by Student's *t*-test;  $***P < 0.001$ .

**Fig-S4 (Hu)**

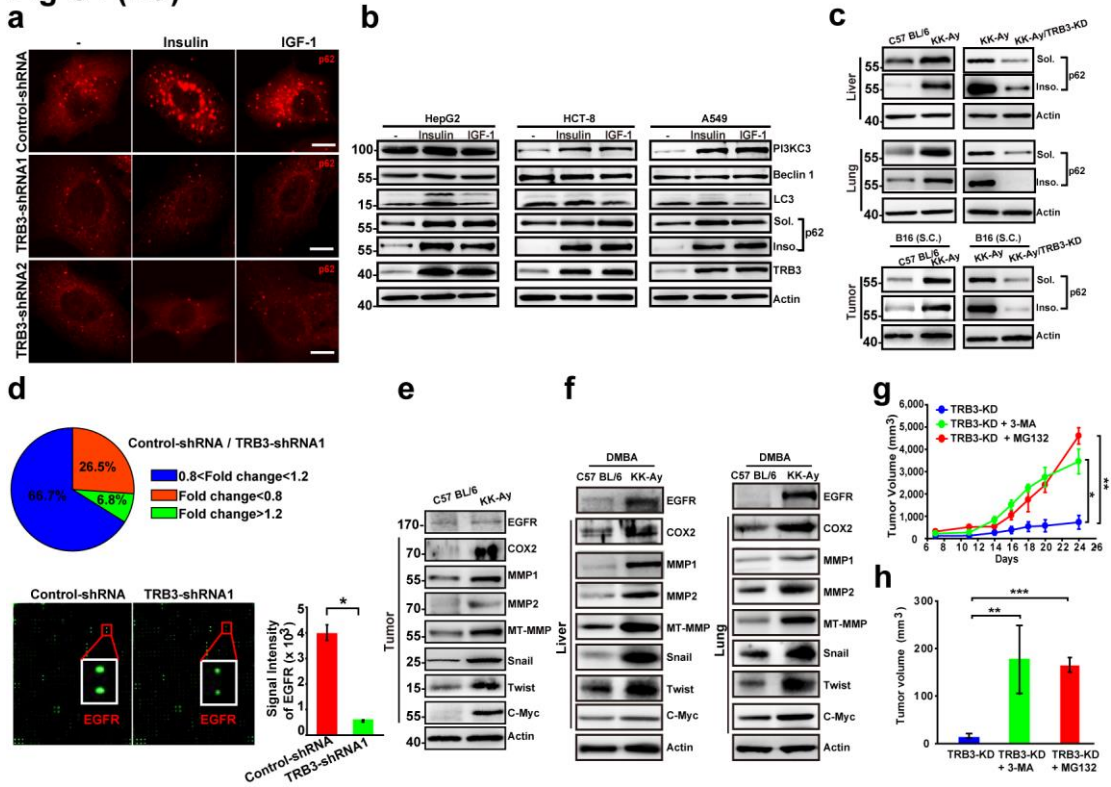

**Supplementary Figure 4. Metabolic stresses induce autophagy inhibition and tumour-promoting factor accumulation.** (a) HepG2 cells were treated with the indicated stimulators for 12 hr and p62 expression was evaluated with an indirect immunofluorescence ( $n=3$  independent assays). Scale bar, 7.5  $\mu\text{m}$ . (b) HepG2, HCT-8 and A549 cells were treated with or without insulin/IGF-1 (100 nM) for 12 hours. The expressions of autophagy related proteins were evaluated with immunoblotting ( $n=5$  independent assays). (c) The expression of soluble and insoluble p62 in liver, lung tissues and xenograft tumours were evaluated with immune-blotting in C57 BL/6, KK-Ay and KK-Ay/TRB3-KD mice. Data are representative immunoblots of 4 independent assays. (d) The cell-wide protein expression was evaluated with Human L-1000 Antibody Arrays in HepG2 cells expressing TRB3-shRNA1 or



control-shRNA. Data are the summarized fold changes of proteins (control-shRNA/TRB3-shRNA1) (upper) and representative spots showing differentially expressed EGFR (framed) (lower). Data are representative of 2 independent assays. (e) The xenograft tumours express higher pro-metastasis and pro-EMT factors in KK-Ay mice than that in C57 BL/6 mice. Data are representative immunoblots of 4 independent assays. (f) The liver and lung tissues express higher pro-metastasis and pro-EMT factors in DMBA-treated KK-Ay mice than that in DMBA-treated C57 BL/6. Data are representative immunoblots of 4 independent assays. (g,h) Suppressing autophagy or UPS reverses the antitumour effect of TRB3 knockdown. TRB3 knockdown KK-Ay mice were s.c. injected with B16-F10 cells ( $1.5 \times 10^5$ ) or *i.v.* injected with B16-F10 cells ( $3 \times 10^5$ ) after infection. The mice were treated with 3-MA ( $30 \text{ mg kg}^{-1}$  per day) or MG132 ( $2.5 \text{ mg kg}^{-1}$ , twice a week) from day 7 after tumour inoculation. Data are mean  $\pm$  s.e.m. of tumour growth curve (g) and total tumour volumes in multiple metastatic sites (h) ( $n=6$  per group). Statistical significance was determined by Student's *t*-test; \* $P < 0.05$ , \*\* $P < 0.01$ , \*\*\* $P < 0.001$ .

**Fig-S5 (Hu)**

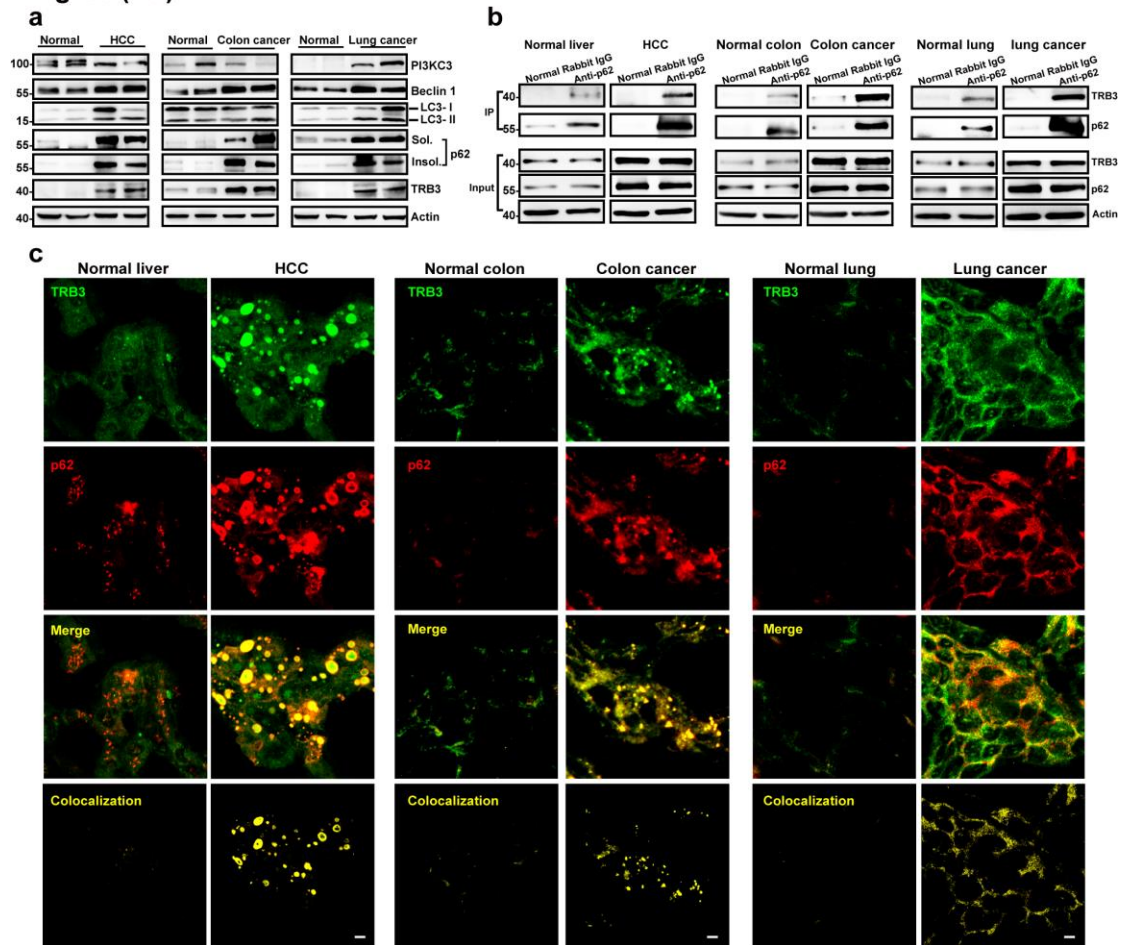

**Supplementary Figure 5. The interaction of TRB3/p62 is enhanced in human tumour tissues.** (a) Expressions of autophagy molecules in HCC, colon and lung cancer tissues were evaluated with immunoblotting ( $n=5$  cases). Normal tissue extracts were used as control ( $n=3$  cases). Data are representative immunoblots of 3 independent assays. (b) Co-IP of endogenous TRB3 and p62 proteins from fresh normal human ( $n=3$  cases) and tumour tissue ( $n=5$  cases) samples. Tissue extracts were IP with anti-p62 Ab or rabbit IgG and blotted with anti-TRB3 Ab. (c) Human normal and cancer tissue array slides were double immunostained with anti-TRB3 (green) or anti-p62 (red) Ab. Double staining in yellow shows TRB3/p62 co-localization. Scale



bar, 5  $\mu$ m. Each column is representative of double-stain ( $n=10$  cases).

**Fig-S6 (Hu)**

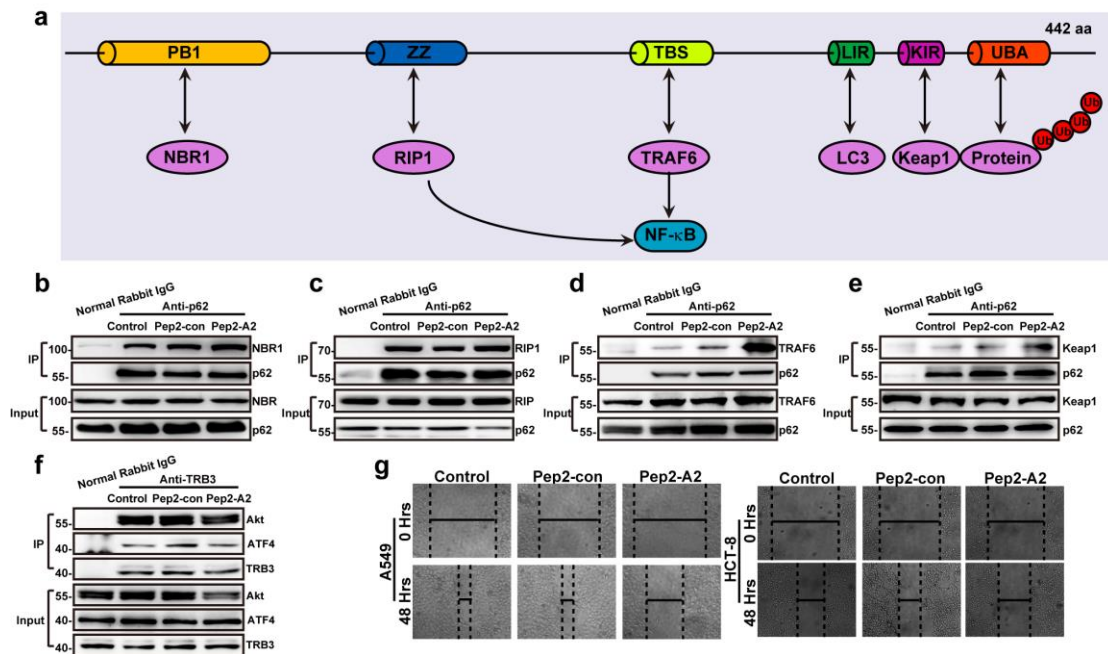

**Supplementary Figure 6. Pep2-A2 treatment increases the binding of p62**

**to TRAF6 and Keap1.** (a) Domain structure of p62. (b-e) The extracts of

HepG2 cells treated with Pep2-con or Pep2-A2 were IP with an anti-p62 Ab or normal rabbit IgG and blotted with anti-NBR1, anti-RIP1, anti-TRAF6 or anti-Keap1 Ab. Data are representative immunoblots of 3 independent assays. (f)

The extracts of HepG2 cells treated with Pep2-con or Pep2-A2 were IP with an anti-TRB3 Ab or normal rabbit IgG and blotted with anti-AKT or anti-ATF4 Ab. Data are representative immunoblots of 3 independent assays. (g) Wound

healing assay was conducted in A549 and HCT-8 cells treated with 5  $\mu$ M of Pep2-A2 or Pep2-con at the indicated times. Data are representative of 3 independent assays.

**Fig-S7 (Hu)**

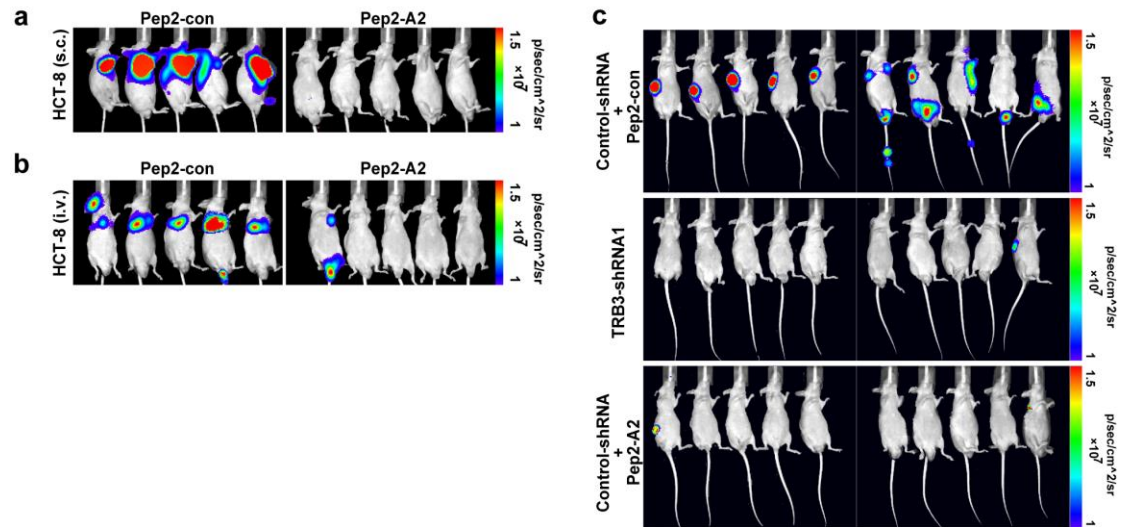

**Supplementary Figure 7. The Pep2-A2 treatment inhibits tumour development and progression. (a, b)** Nude mice were s.c. or *i.v.* inoculated with HCT-8 cells into the right flank ( $1.5 \times 10^6$ ) or the lateral tail vein ( $3 \times 10^6$ ). One week after tumour inoculation, mice were *i.v.* treated with the Pep2-A2 or Pep2-con ( $5 \text{ mg kg}^{-1}$ ) twice a week for 5 weeks. Data are representative biophotonic images ( $n=6$  per group). **(c)** Pep2-A2 inhibits primary recurrence and multi-organ metastasis. Nude mice were s.c. inoculated with HepG2 cells expressing control-shRNA1 ( $n=20$ ) or TRB3-shRNA2 ( $n=10$ ). When tumours reached a volume of  $300 \text{ mm}^3$ , tumour resection was performed. The control-shRNA mice ( $n=10$ ) were randomly selected for treating with Pep2-A2 for 2 months ( $5 \text{ mg kg}^{-1}$ , *i.v.*, beginning 1 day post-resection). Data are representative biophotonic images of animals with primary tumour recurrence.

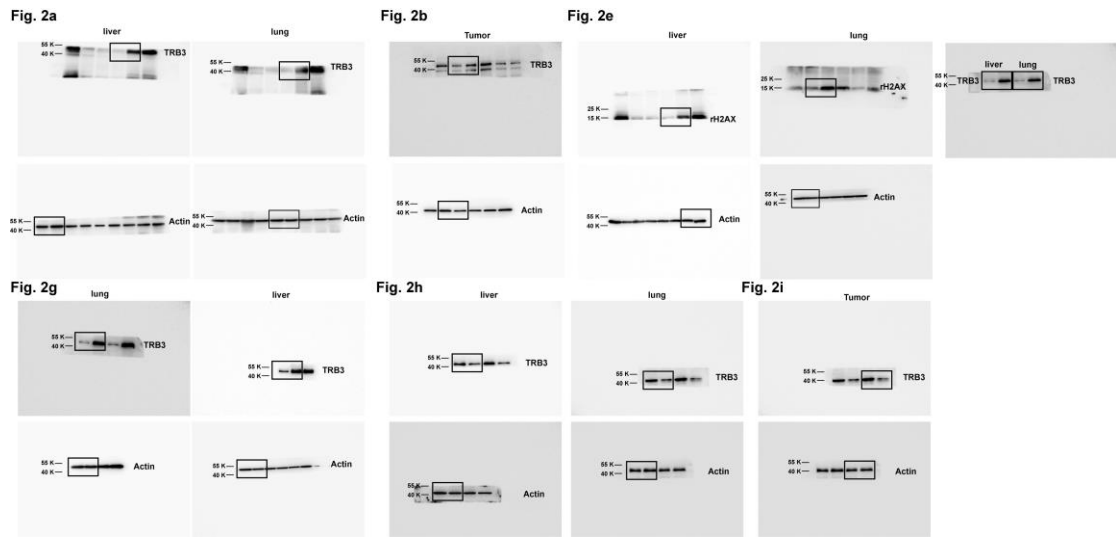

**Supplementary Figure 8. Uncropped blots used in Figure 2.**

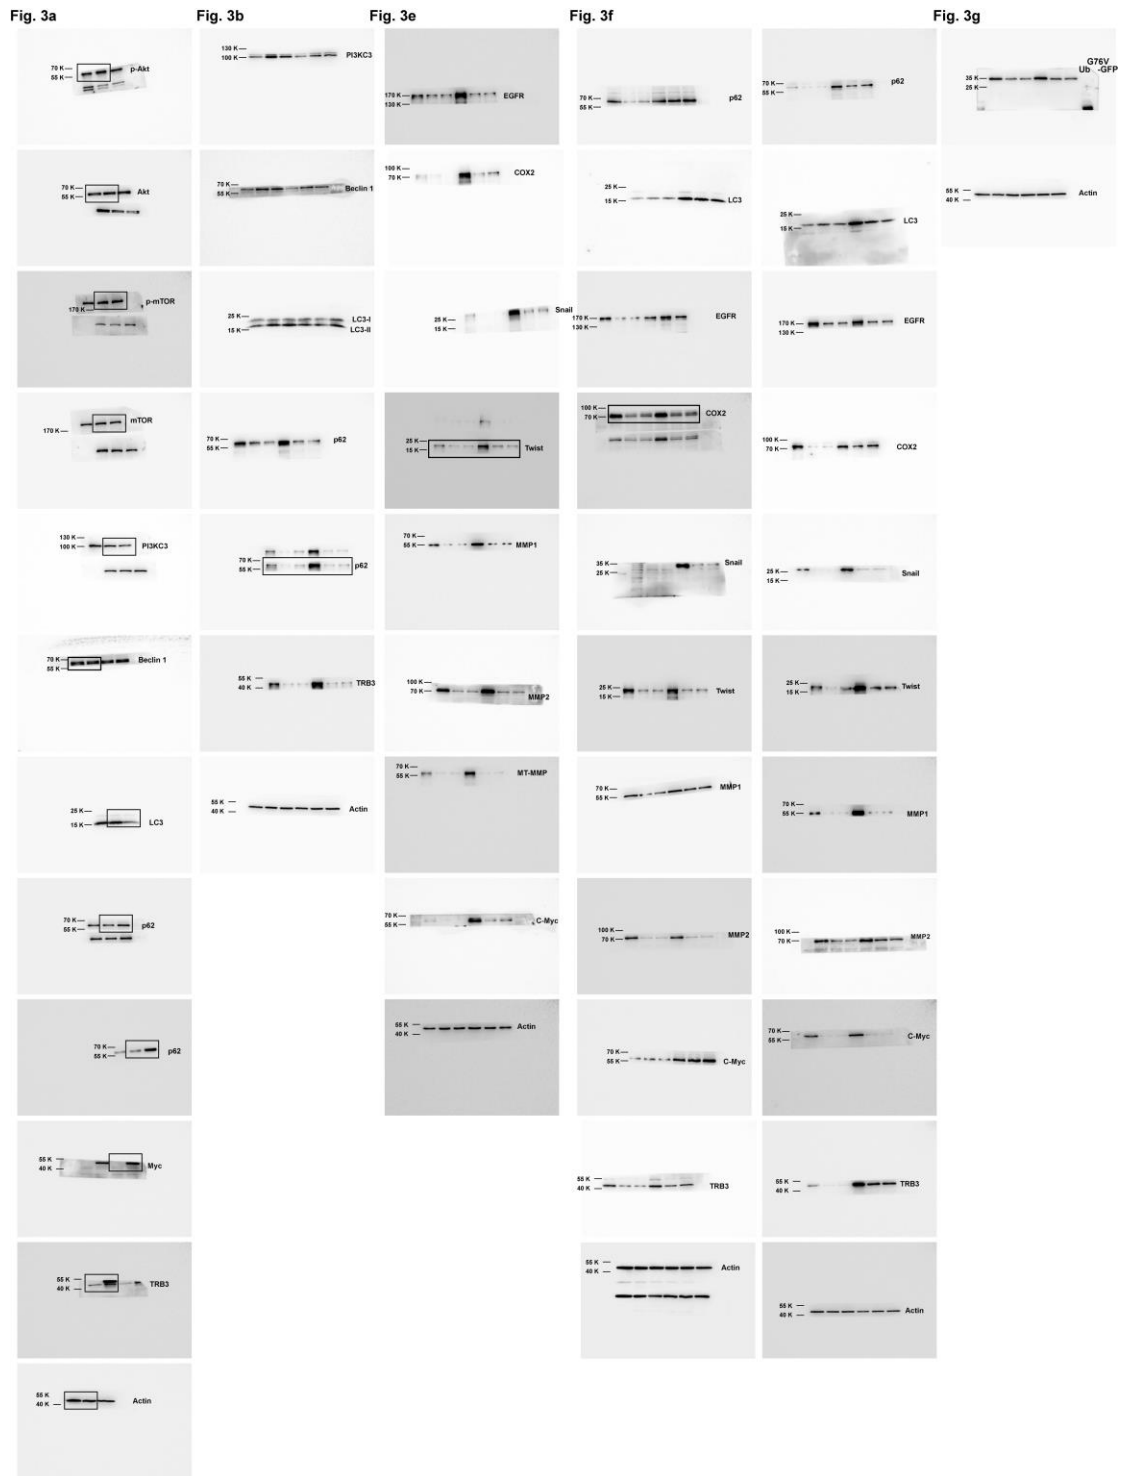

Supplementary Figure 9. Uncropped blots used in Figure 3.

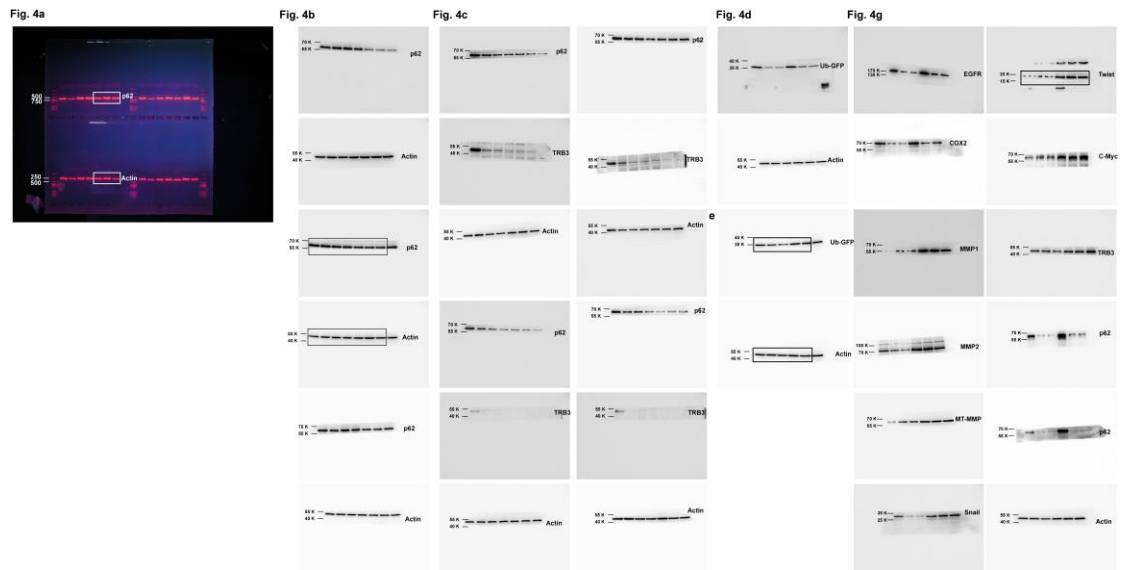

**Supplementary Figure 10. Uncropped blots used in Figure 4.**

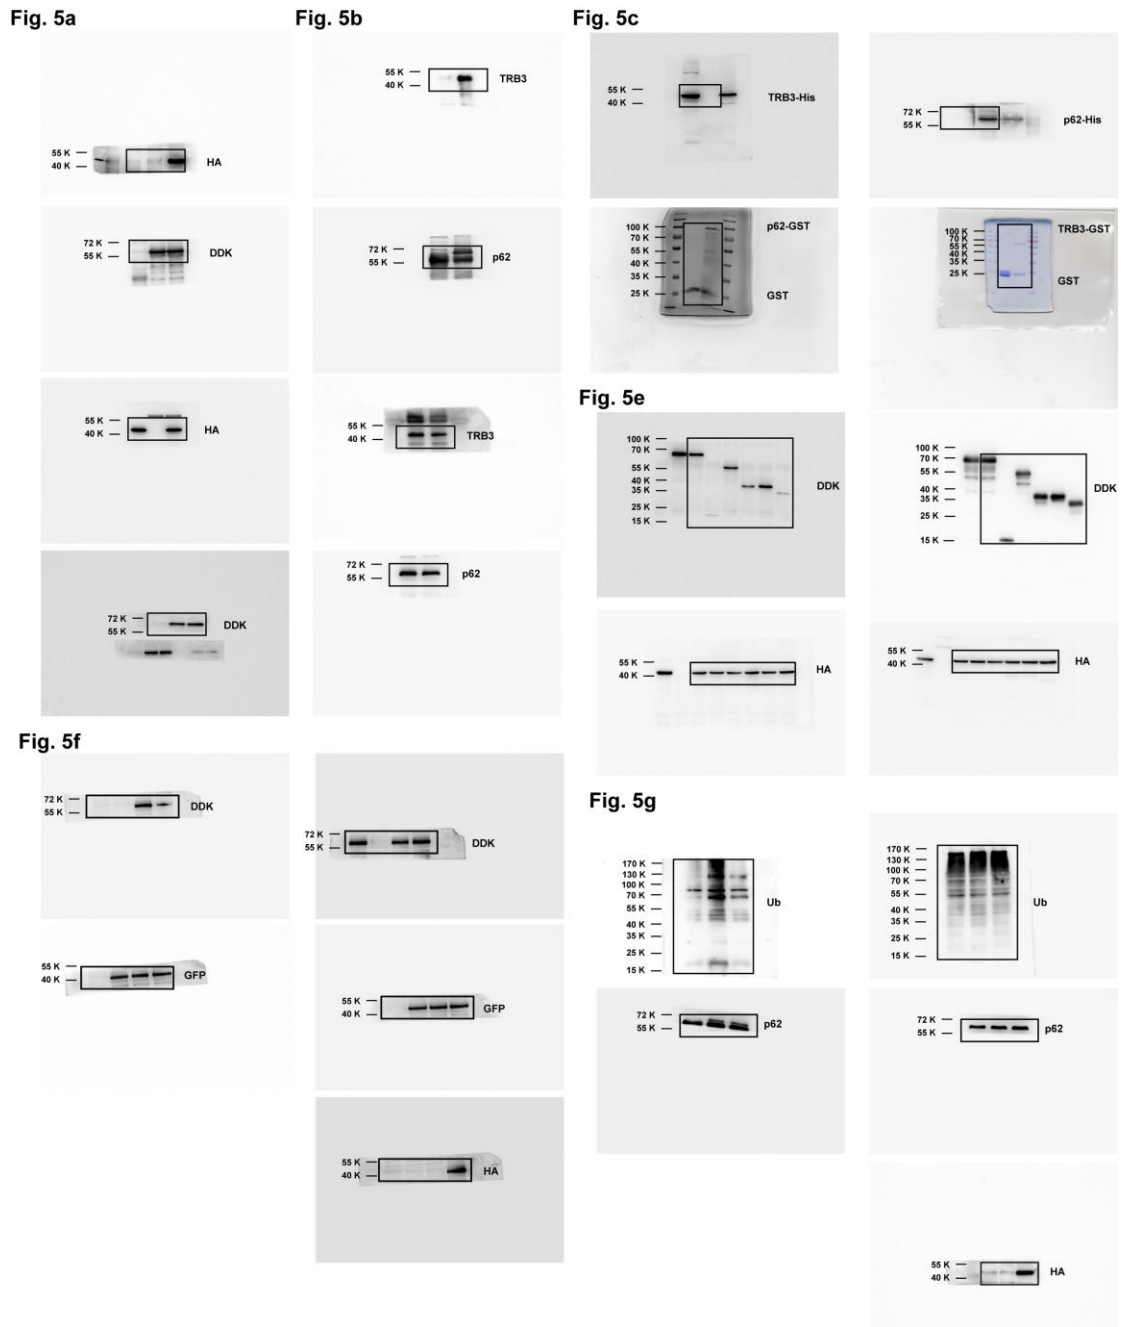

Supplementary Figure 11. Uncropped blots used in Figure 5.



**Fig. 7a**

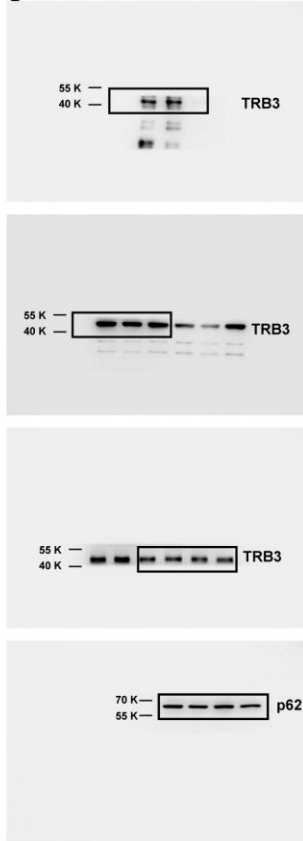

**Fig. 7b**

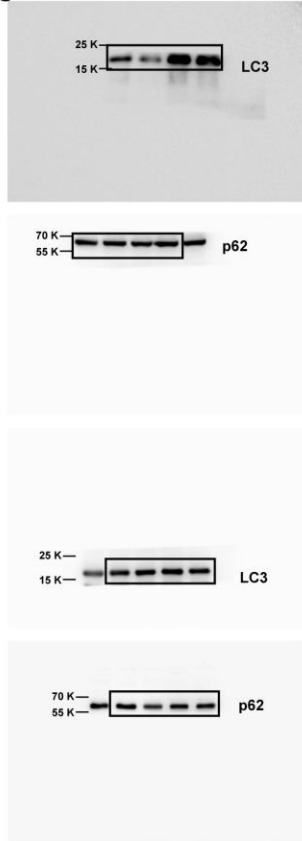

**Fig. 7c**

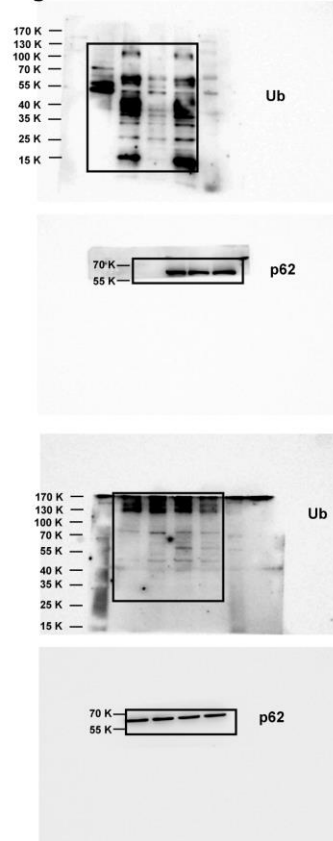

**Fig. 7e**

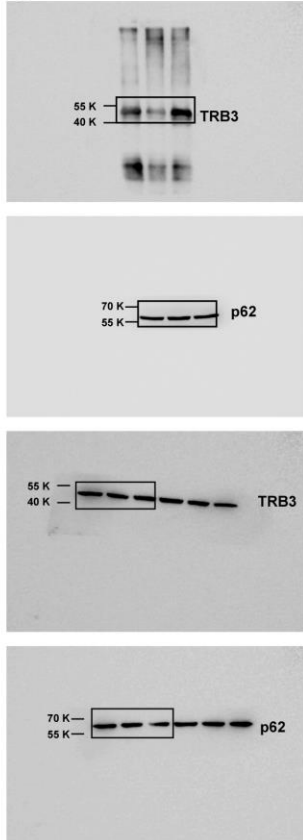

**Fig. 7f**

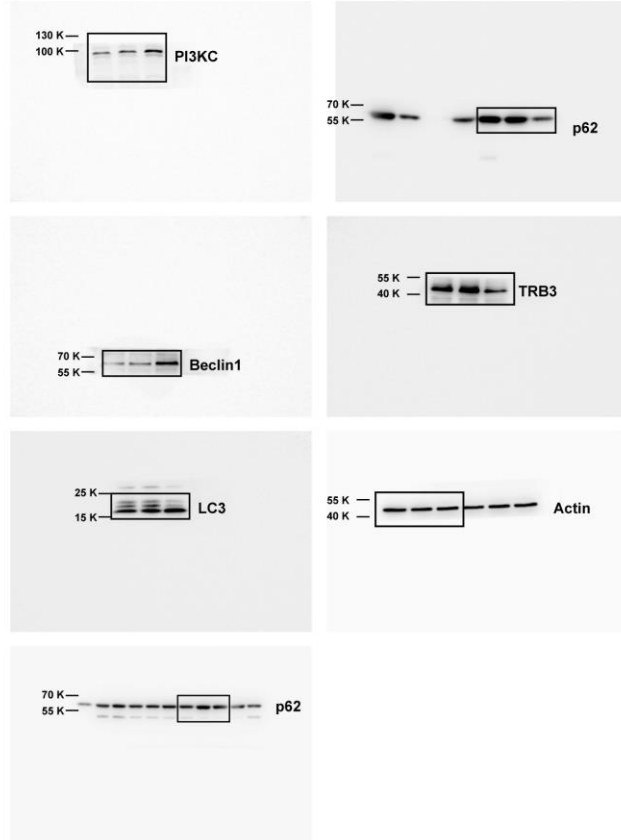

**Supplementary Figure 12. Uncropped blots used in Figure 7a-f.**

Fig. 7h

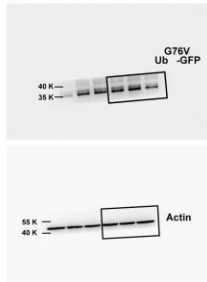

Fig. 7i

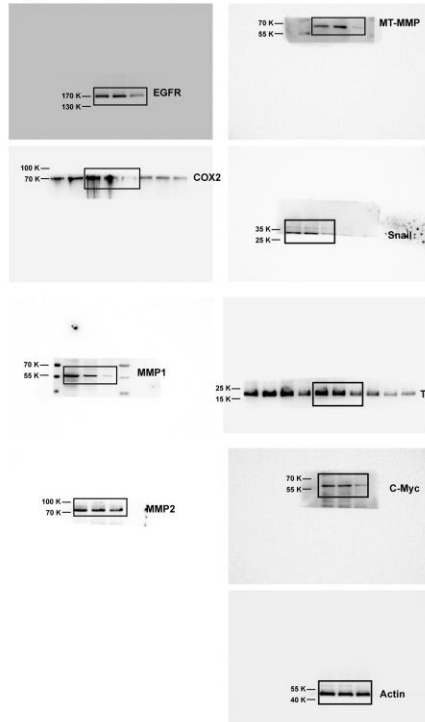

Fig. 7j

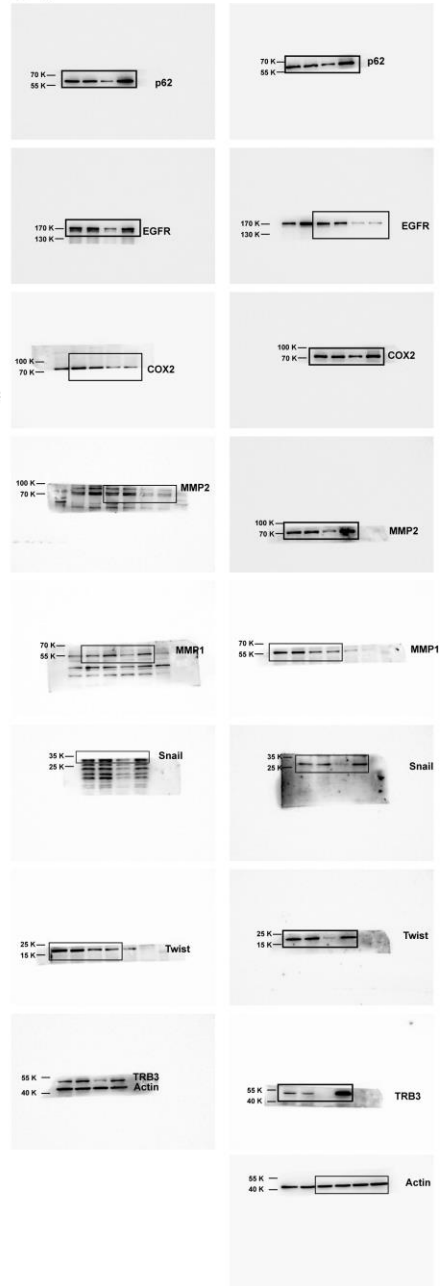

Supplementary Figure 13. Uncropped blots used in Figure 7h-j.

**Fig. 8e**

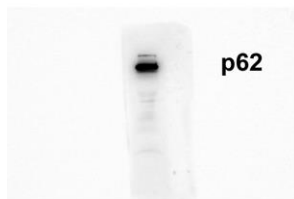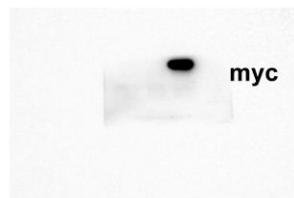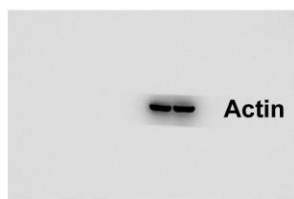

**Supplementary Figure 14. Uncropped blots used in Figure 8.**

Fig. S1a

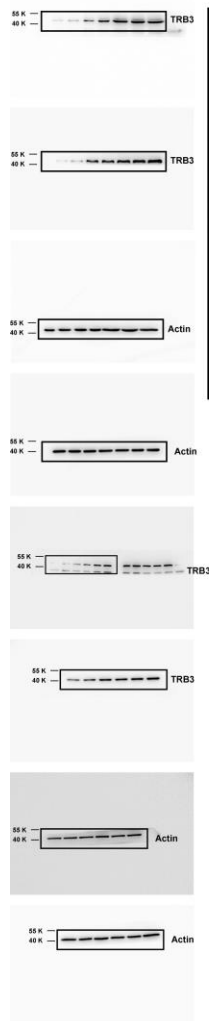

Fig. S1b

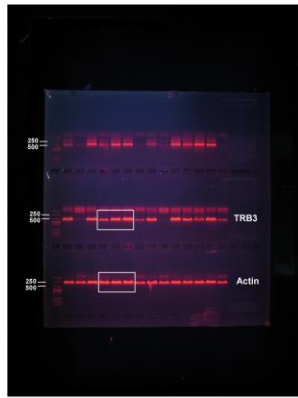

Fig. S1d

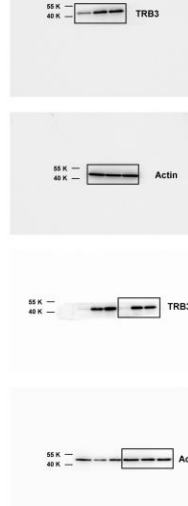

Fig. S1e

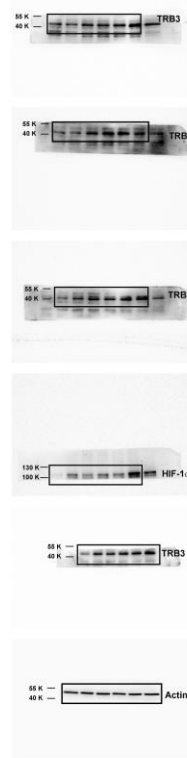

Fig. S1f

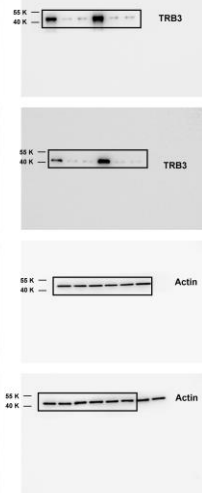

Supplementary Figure 15. Uncropped blots used in Supplementary Figure 1a-f.

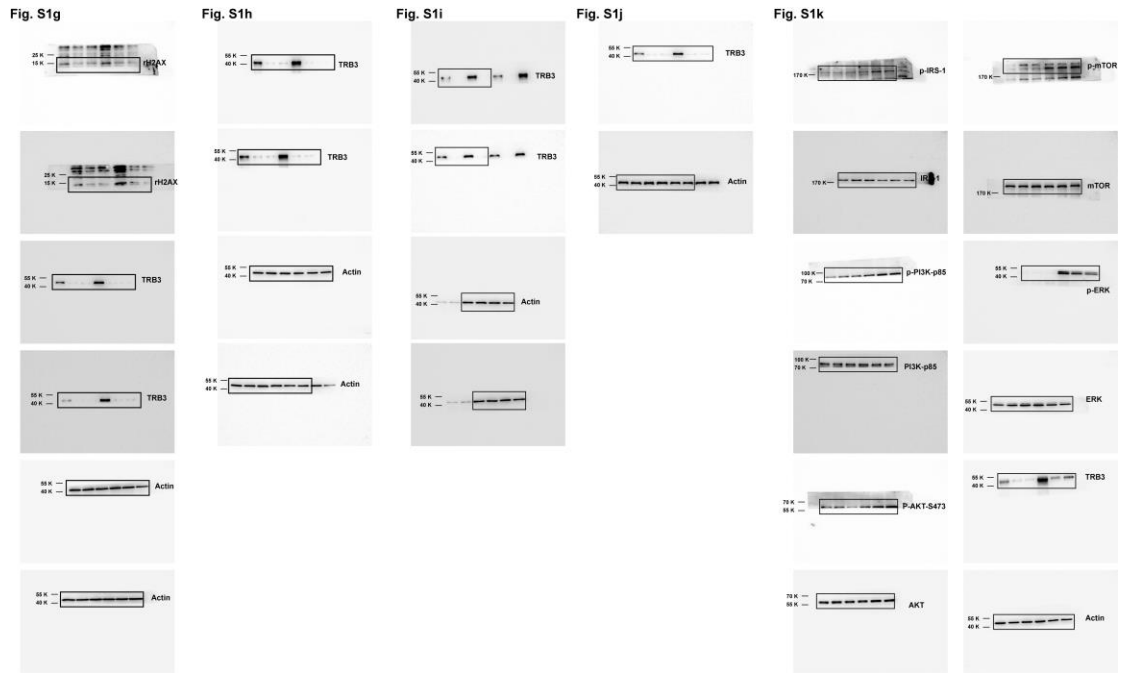

**Supplementary Figure 16. Uncropped blots used in Supplementary Figure 1g-k.**

**Fig. S2a**

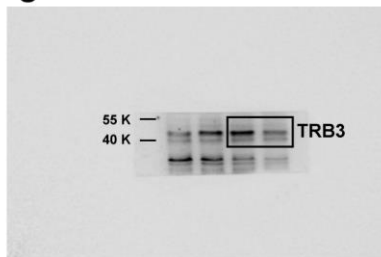

**Fig. S2c**

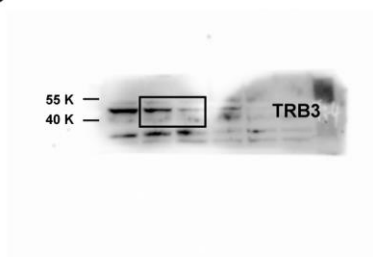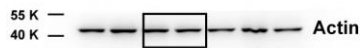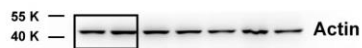

**Supplementary Figure 17. Uncropped blots used in Supplementary Figure 2.**

**Fig. S4b**

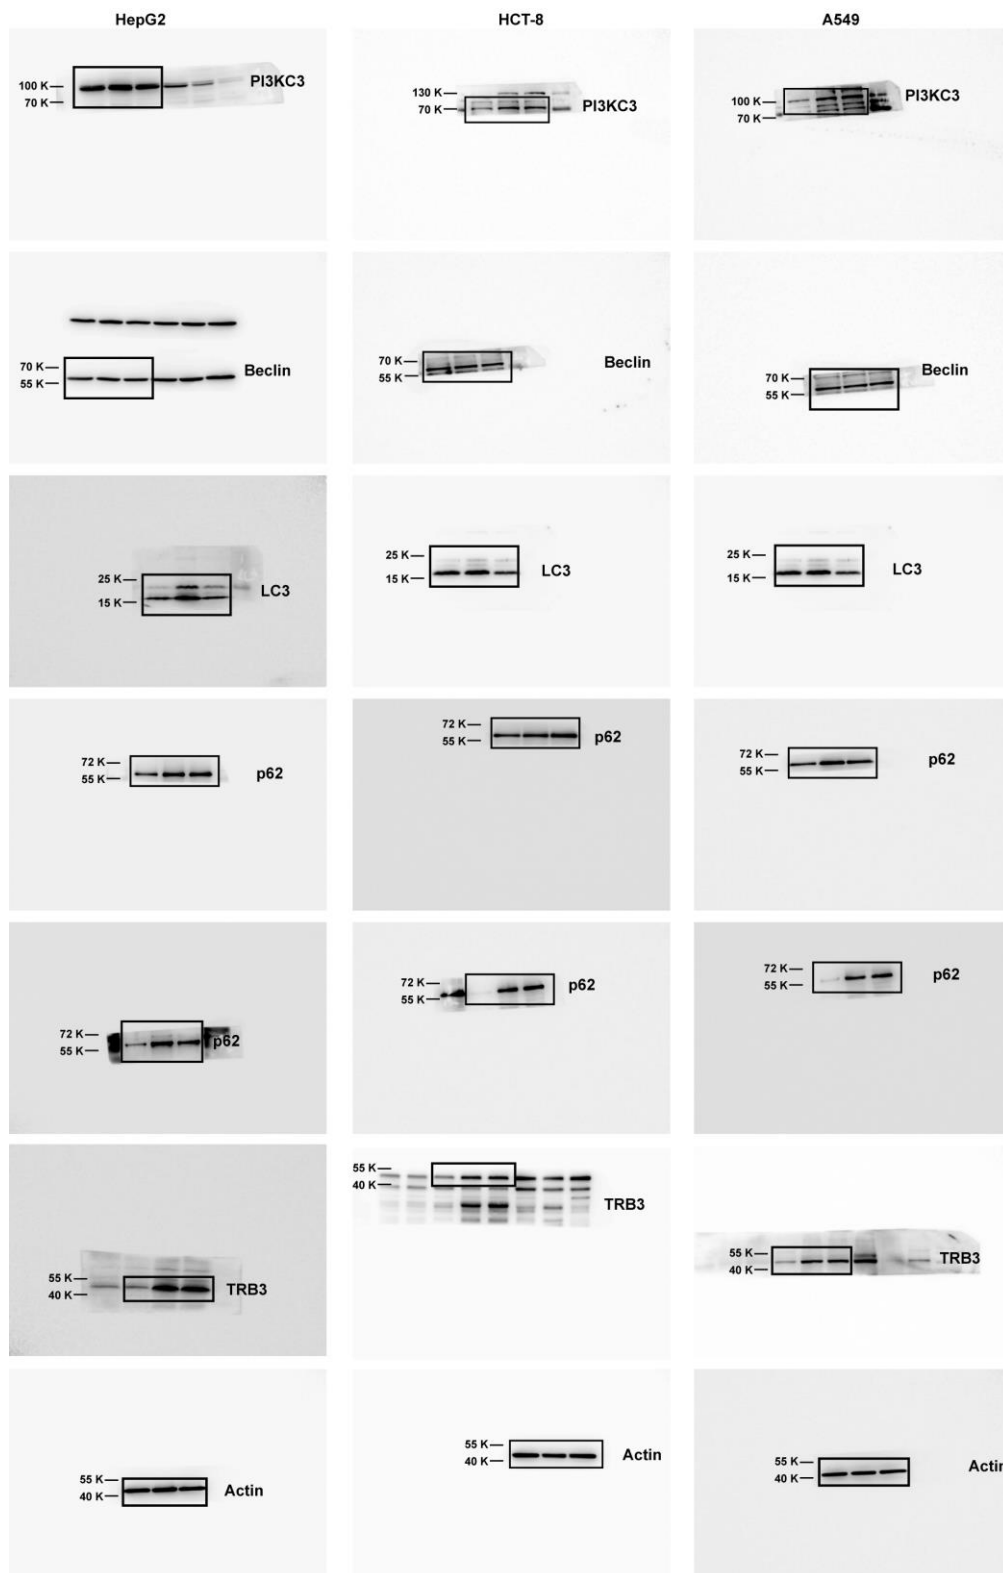

**Supplementary Figure 18. Uncropped blots used in Supplementary Figure 4b.**



Fig S4c

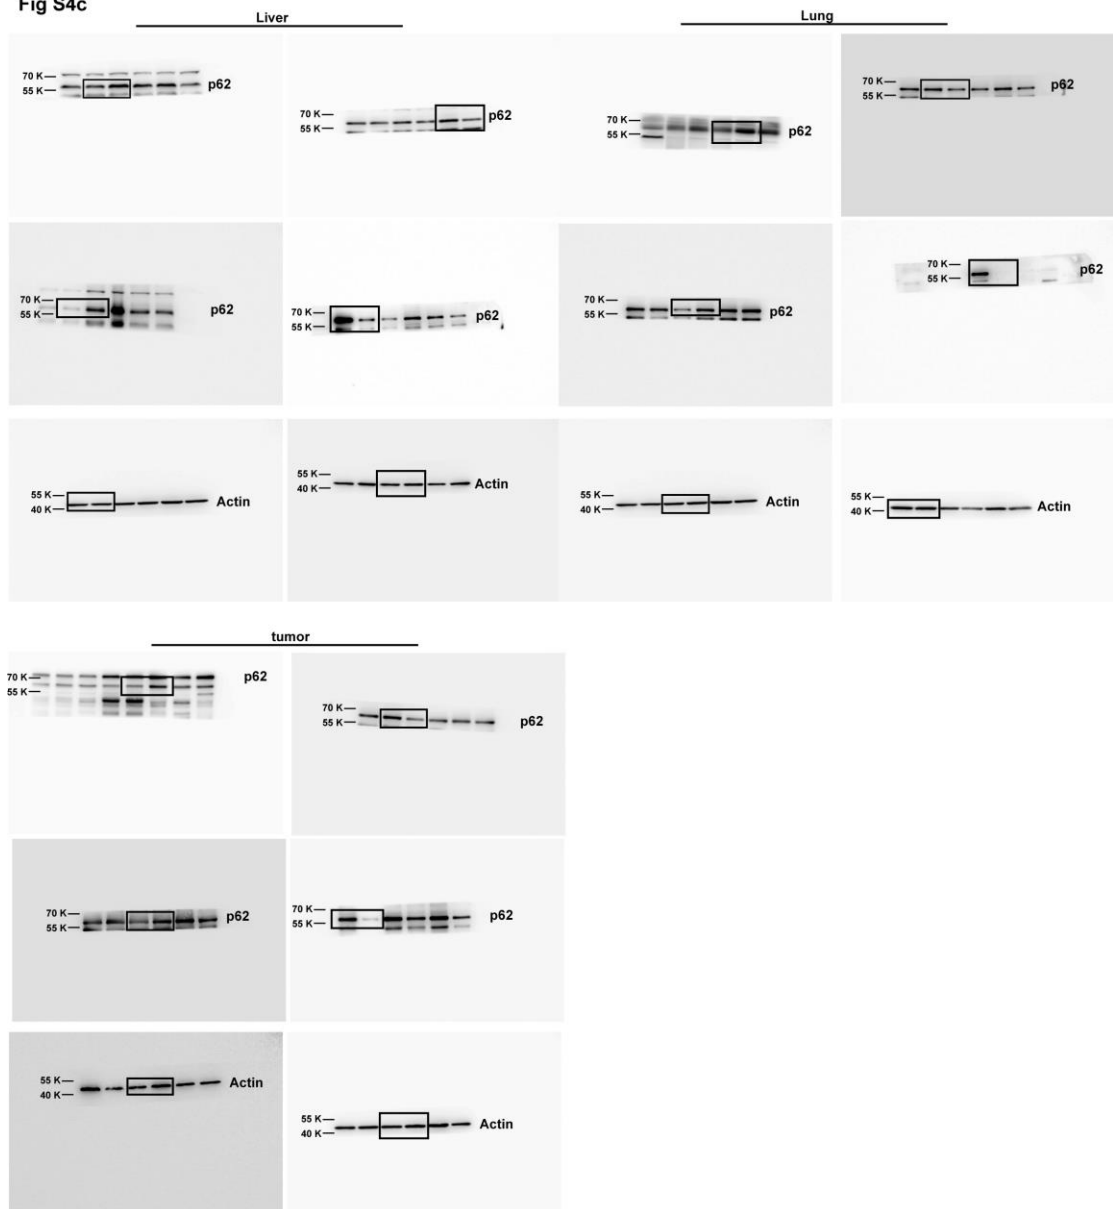

Supplementary Figure 19. Uncropped blots used in Supplementary Figure 4c.

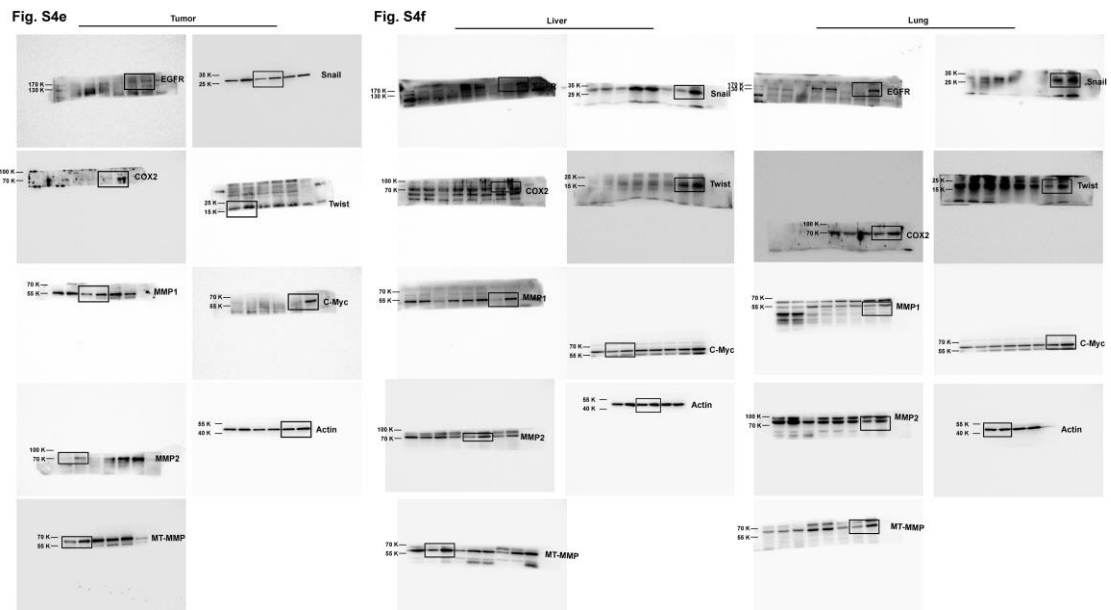

**Supplementary Figure 20. Uncropped blots used in Supplementary Figure 4e-f.**

**Fig. S5a**

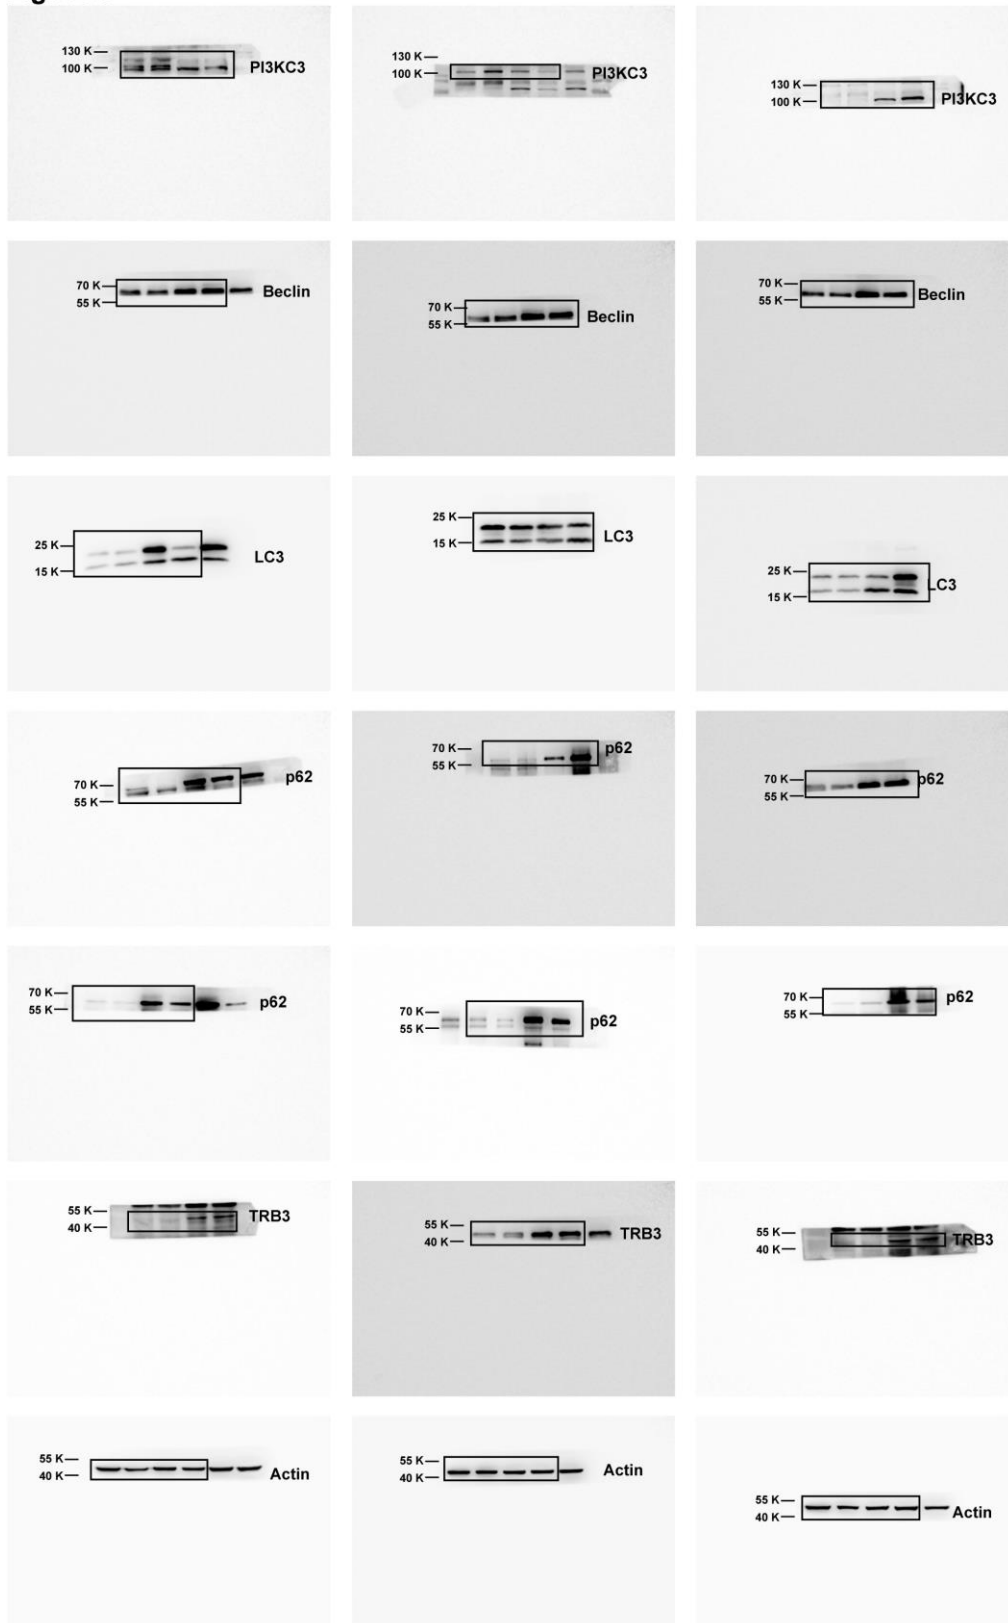

**Supplementary Figure 21. Uncropped blots used in Supplementary Figure 5a.**

Fig. S5b

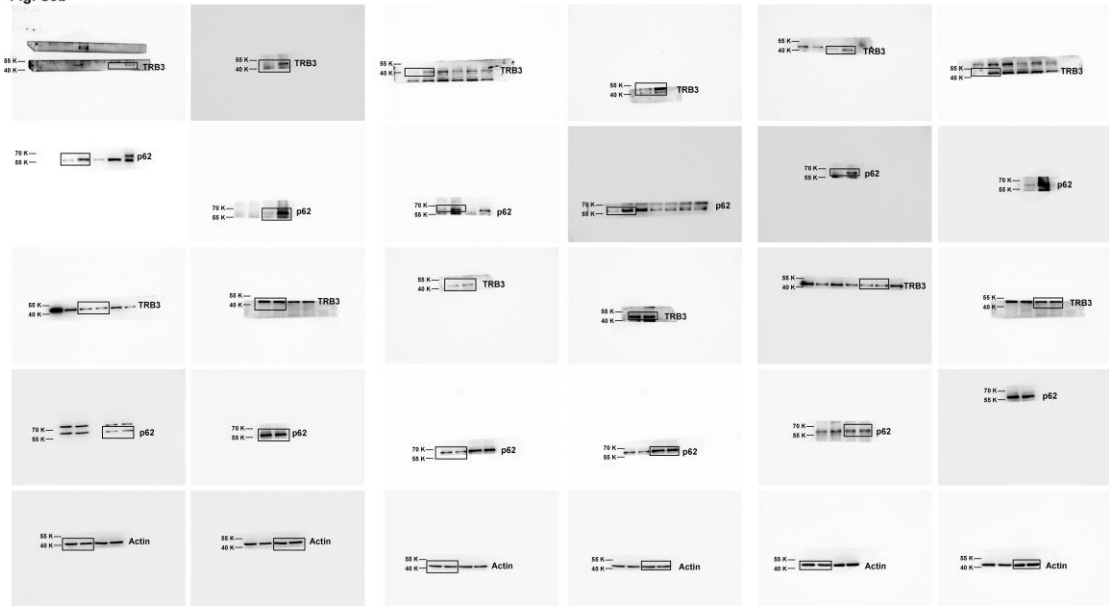

Supplementary Figure 22. Uncropped blots used in Supplementary Figure 5b.

Fig. S6b

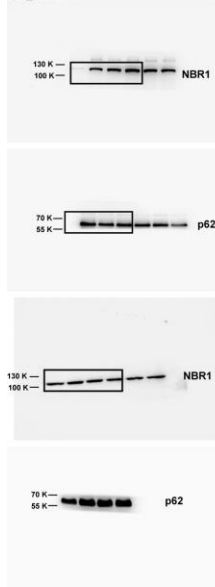

Fig. S6c

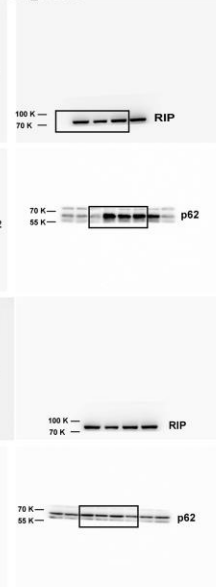

Fig. S6d

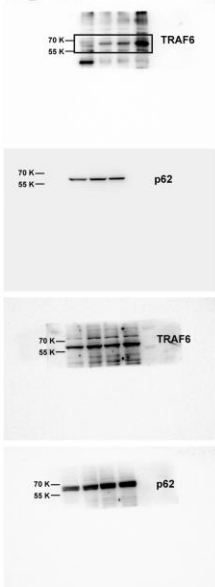

Fig. S6e

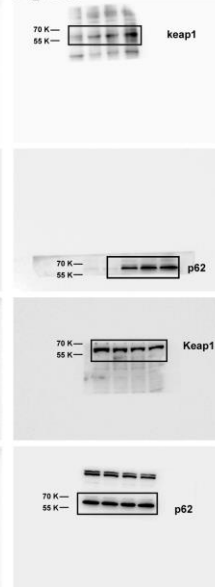

Fig. S6f

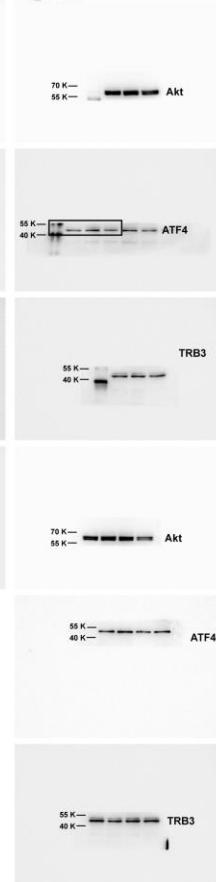

Supplementary Figure 23. Uncropped blots used in Supplementary Figure 6.

**Supplementary Table 1. Correlation between TRB3 and pIRS protein expression levels in HCC, colon cancer and lung cancer.**

|                             | HCC<br><i>n</i> =71 |      | Colon cancer<br><i>n</i> =69 |      | Lung cancer<br><i>n</i> =65 |      |
|-----------------------------|---------------------|------|------------------------------|------|-----------------------------|------|
| Protein expression          | TRB3                | pIRS | TRB3                         | pIRS | TRB3                        | pIRS |
| Pearson r                   | 0.2721              |      | 0.283                        |      | 0.34                        |      |
| <i>P</i> value (two-tailed) | 0.0217              |      | 0.023                        |      | 0.004                       |      |
| <i>P</i> value summary      | *                   |      | *                            |      | **                          |      |

**Supplementary Table 2. Multiorgan metastasis of B16-F10 melanoma cells injected intravenously in C57 BL/6 and diabetic KK-Ay mice.**

| Group         | Tissue classes |         |        |                     |             |        |
|---------------|----------------|---------|--------|---------------------|-------------|--------|
|               | Mesentery      | Omentum | Lung   | Axillary Lymph Node | Mediastinum | Kidney |
| C57 BL/6      | 0.00%          | 0.00%   | 50.00% | 0.00%               | 8.33%       | 0.00%  |
| KK-Ay         | 45.00%         | 18.00%  | 63.00% | 36.00%              | 27.00%      | 9.09%  |
| KK-Ay/control | 0.00%          | 1.25%   | 62.50% | 25.00%              | 50.00%      | 12.50% |
| KK-Ay/TRB3-KD | 0.00%          | 0.00%   | 57.10% | 0.00%               | 42.80%      | 0.00%  |

\*Each Value shows the percentage of multiorgan metastasis.

**Supplementary Table 3. Global protein changes observed in HepG2 cells expressing control-shRNA versus HepG2 cells expressing TRB3-shRNA1.**

Supplementary Table 3a

| Fold change>1.2<br>Control-shRNA/TRB3-shRNA1 |                             |                        |
|----------------------------------------------|-----------------------------|------------------------|
| Cancer-promoting factor                      | Cancer-inhibiting factor    | Others                 |
| EGFR/ErbB1                                   | HADHA                       | CD30 Ligand/TNFSF8     |
| OSM                                          | IL-9                        | CD30/TNFRSF8           |
| Glypican 5                                   | CD40 Ligand / TNFSF5 /CD154 | IL-4                   |
| Frizzled-7                                   | Dkk-3                       | Siglec-5/CD170         |
| IL-5                                         | Granzyme A                  | HCR / CRAM-A/B         |
| IL-11                                        | FADD                        | IL-2 R beta /CD122     |
| FGF-18                                       | HSP60                       | RELM alpha             |
| Thrombopoietin (TPO)                         |                             | IL-2 R gamma           |
| MMP-3                                        |                             | CD14                   |
| CXCR4 (fusin)                                |                             | DR6 / TNFRSF21         |
| GM-CSF                                       |                             | IFN-gamma              |
| BMP-5                                        |                             | HCC-4 / CCL16          |
| Frizzled-3                                   |                             | Prolactin              |
| EDG-1                                        |                             | IL-2                   |
| Endothelin                                   |                             | IL-3                   |
| 6Ckine                                       |                             | NT-3                   |
| S100A6                                       |                             | FGF-13 1B              |
| VEGF-D                                       |                             | IL-10 R alpha          |
| IL-17                                        |                             | ICAM-5                 |
| Insulin                                      |                             | IL-18 R alpha /IL-1 R5 |
| GRO-a                                        |                             |                        |
| CCL28 / VIC                                  |                             |                        |
| p21                                          |                             |                        |
| GRO                                          |                             |                        |
| GDF5                                         |                             |                        |
| FGF-17                                       |                             |                        |
| FGF-5                                        |                             |                        |
| PTHLP                                        |                             |                        |
| GDF1                                         |                             |                        |
| HSP90                                        |                             |                        |
| Frizzled-4                                   |                             |                        |
| MCP-1                                        |                             |                        |
| LRG1                                         |                             |                        |
| Frizzled-1                                   |                             |                        |



|                          |  |  |
|--------------------------|--|--|
| GCSF                     |  |  |
| GDF9                     |  |  |
| Cathepsin B              |  |  |
| IL-1 sRI                 |  |  |
| E-Selectin               |  |  |
| VEGF R3                  |  |  |
| Angiopoietin-like Factor |  |  |

Supplementary Table 3b

| Fold change < 0.8<br>Control shRNA / TRB3 shRNA1 |                          |                      |
|--------------------------------------------------|--------------------------|----------------------|
| Cancer-promoting factor                          | Cancer-inhibiting factor | Others               |
| GATA-4                                           | SIGIRR                   | CD36                 |
| TRPM7                                            | AMPKa1                   | OX40 Ligand / TNFSF4 |
| MMP-20                                           | WIF-1                    | ApoE3                |
| Neuritin                                         | Cadherin-13              | Cytokeratin 8        |
| AFP                                              | ADAMTS-1                 | IL-1 F8 / FIL1 eta   |
| APN                                              | CRTAM                    | Calsyntenin-1        |
| ANGPTL3                                          | TNF-beta                 | 11b-HSD1             |
| CRP                                              | Cytokeratin 18           | ADAMTS-17            |
| CEA                                              | Afamin                   | ApoB100              |
| Glut3                                            | SSTR2                    | Serpin A8            |
| CD44                                             | CNDP1                    | GPBB                 |
| LPS                                              | DEFA1/3                  | Neurokinin-A         |
| Ras                                              | HOXA10                   | Alpha 1 AG           |
| FGF-11                                           | FOXN3                    | 2B4                  |
| FSH                                              | CBP                      | SMDF / NRG1 Isoform  |
| GLP-1                                            | Calreticulin             | BAF57                |
| S100 A8/A9                                       | APC                      | ESAM                 |
| MMP-15                                           | Alpha Lactalbumin        | Apelin               |
| ASPH                                             | FABP3                    | SDF-1 / CXCL12       |
| Factor XIII A                                    | VWF                      | Thymopoietin         |
| FGFR1 alpha                                      | LECT2                    | CTACK / CCL27        |
| Tie-1                                            | S100A8                   | C-peptide            |
| GRP                                              | Presenilin 1             | GPR-39               |
| CD59                                             | Clusterin                | Amylin               |
| Aldolase A                                       | FRK                      | VEGF                 |
| CA 125                                           | KLF4                     | FoxP3                |
| Apex1                                            | GADD45A                  | ADAMTS-15            |
| ADAM-9                                           | PTPRD                    | Procalcitonin        |
| pro-MMP13                                        | IL-29                    | C5/C5a               |
| SHBG                                             | GDF3                     | ADAMTS-19            |
| CA 19-9                                          | Chromogranin A           | GPI                  |

| Mesothelin          | E-Cadherin         | ADAMTS-18                       |
|---------------------|--------------------|---------------------------------|
| hCGb                | Defensin           | cTnT                            |
| SPINK1              | Thrombospondin-1   | Fibrinopeptide A                |
| ABL1                | EXTL2              | APCS                            |
| Aldolase C          | Serpin A5          | CXCR2 / IL-8 RB                 |
| EphA6               | EphB3              | Growth Hormone (GH)             |
| EphA4               | LTF                | GMNN                            |
| Fyn                 | MTUS1              | Uromodulin                      |
| EphA3               | Caspase-8          | BNP                             |
| Thymidine Kinase-1  | IL-21              | Cytokeratin 19                  |
| Kallikrein 10       | IL-21 R            | C9                              |
| CA 15-3             | BAI-1              | CCK                             |
| Desmin              | VDUP-1             | ApoC1                           |
| ALK                 | Vitamin D Receptor | MSHa                            |
| Layilin             | Nesfatin           | Ceruloplasmin                   |
| EphA7               | Cystatin A         | LYRIC                           |
| IL-19               | TNK1               | ApoA4                           |
| ENPP2               | Serpin A1          | NR3C3                           |
| Kallikrein 2        |                    | INSRR                           |
| ACK1                |                    | CD71                            |
| Gelsolin            |                    | Endorphin Beta                  |
| KCC3                |                    | BCAM                            |
| NAIP                |                    | C7                              |
| CHI3L1              |                    | hCG alpha                       |
| Kallikrein 14       |                    | MATK                            |
| SCG3                |                    | IL-12 p70                       |
| S-100b              |                    | Corticosteroid-binding globulin |
| NF1                 |                    | EV15L                           |
| Pancreastatin       |                    | CK-MB                           |
| Calbindin           |                    | TRA-1-81                        |
| MINA                |                    | TSH                             |
| Lyn                 |                    | CART                            |
| VE-Cadherin         |                    | PSP                             |
| HE4                 |                    | Thyroglobulin                   |
| XIAP                |                    | TRAIL R1 / DR4 / TNFRSF10A      |
| CA 9                |                    | Cystatin C                      |
| BMX                 |                    | GST                             |
| PI 3Kinase p85 beta |                    | LTK                             |
| FAK                 |                    | LH                              |
| EphB2               |                    | Itk                             |
| FER                 |                    | Troponin C                      |
| EphA5               |                    | C8B                             |
| TRA-1-60            |                    | FIH                             |
| VIP Receptor 2      |                    | gamma-Thrombin                  |

|                       |  |                     |
|-----------------------|--|---------------------|
| uPAR                  |  | BD-1                |
| Inhibin A             |  | ProSAAS             |
| EphA8                 |  | Creatinine          |
| Endothelin Receptor A |  | SERPING1            |
| Btk                   |  | POMC                |
| Protein p65           |  | Angiopoietin-like 2 |
| Complement factor H   |  | Marapsin            |
| CD46                  |  | NPTX1               |
| Calcitonin            |  | NELL2               |
| PSA-total             |  | FGFR1               |
| PAI-1                 |  | TXK                 |
| GRP75                 |  | TPA                 |
| Fen 1                 |  | Tec                 |
| Somatotropin          |  | pro-Glucagon        |
| Hck                   |  | Thrombin            |
| Nanog                 |  | GFR alpha-4         |
| NET1                  |  | SRMS                |
| HSP10                 |  | PPARg2              |
| IGF-II R              |  | TRPC6               |
| Trappin-2             |  | NRG3                |
| SART1                 |  |                     |
| IL-1 R8               |  |                     |
| Prohibitin            |  |                     |
| Insulin R             |  |                     |
| Omentin               |  |                     |
| INSL3                 |  |                     |
| ZAP70                 |  |                     |
| PSA-Free              |  |                     |
| Tyk2                  |  |                     |
| clAP-2                |  |                     |
| TYRO10                |  |                     |
| HSP27                 |  |                     |
| Ferritin              |  |                     |
| COCO                  |  |                     |
| ROR2                  |  |                     |
| ACTH                  |  |                     |
| Kallikrein 11         |  |                     |
| Mammaglobin A         |  |                     |
| CD74                  |  |                     |
| MIF                   |  |                     |
| Erythropoietin R      |  |                     |
| IL-13                 |  |                     |
| ROR1                  |  |                     |
| TRKB                  |  |                     |
| RYK                   |  |                     |

(a) Proteins with expression downregulated when silencing TRB3 (Control-shRNA/TRB3-shRNA1>1.2). (b) Proteins with expression upregulated when silencing TRB3 (Control-shRNA/TRB3-shRNA1<0.8).

**Supplementary Table 4. Summary of pathological information of human cancer specimens used for immunoblot analysis.**

| Sample NO. | Age | Gender | Tissue Type | Diagnosis                                           | TNM                                          |
|------------|-----|--------|-------------|-----------------------------------------------------|----------------------------------------------|
| 1          | 27  | Female | liver       | Normal liver tissue                                 |                                              |
| 2          | 30  | Female | liver       | Normal liver tissue                                 |                                              |
| 3          | 35  | Male   | liver       | Normal liver tissue                                 |                                              |
| 4          | 45  | Male   | liver       | Hepatocellular carcinoma, moderately differentiated | T <sub>2</sub> N <sub>0</sub> M <sub>0</sub> |
| 5          | 51  | Male   | liver       | Hepatocellular carcinoma, poorly differentiated     | T <sub>3</sub> N <sub>0</sub> M <sub>0</sub> |
| 6          | 62  | Male   | liver       | Hepatocellular carcinoma, poorly differentiated     |                                              |
| 7          | 59  | Male   | liver       | Hepatocellular carcinoma, moderately differentiated |                                              |
| 8          | 66  | Female | liver       | Hepatocellular carcinoma, poorly differentiated     | T <sub>4</sub> N <sub>x</sub> M <sub>x</sub> |
| 9          | 24  | Male   | Colon       | Normal colon tissue                                 |                                              |
| 10         | 25  | Male   | Colon       | Normal colon tissue                                 |                                              |
| 11         | 40  | Female | Colon       | Normal colon tissue                                 |                                              |
| 12         | 75  | Male   | Colon       | Adenocarcinoma, well or moderately differentiated   | T <sub>3</sub> N <sub>0</sub> M <sub>x</sub> |
| 13         | 41  | Male   | Colon       | Mucinous adenocarcinoma, poorly differentiated      | T <sub>3</sub> N <sub>x</sub> M <sub>1</sub> |
| 14         | 72  | Male   | Colon       | Adenocarcinoma, moderately differentiated           | T <sub>3</sub> N <sub>0</sub> M <sub>x</sub> |
| 15         | 61  | Female | Colon       | Adenocarcinoma, well or moderately differentiated   | T <sub>1</sub> N <sub>0</sub> M <sub>0</sub> |
| 16         | 50  | Male   | Colon       | Adenocarcinoma, moderately differentiated           | T <sub>3</sub> N <sub>0</sub> M <sub>x</sub> |
| 17         | 28  | Male   | Lung        | Normal lung tissue                                  |                                              |
| 18         | 28  | Male   | Lung        | Normal lung tissue                                  |                                              |
| 19         | 25  | Female | Lung        | Normal lung tissue                                  |                                              |
| 20         | 60  | Female | Lung        | Adenosquamous carcinoma                             | T <sub>3</sub> N <sub>0</sub> M <sub>0</sub> |
| 21         | 52  | Female | Lung        | Adenosquamous carcinoma                             | T <sub>4</sub> N <sub>1</sub> M <sub>0</sub> |
| 22         | 70  | Male   | Lung        | Small cell carcinoma and squamous cell carcinoma    | T <sub>4</sub> N <sub>1</sub> M <sub>x</sub> |
| 23         | 64  | Male   | Lung        | Adenosquamous carcinoma, moderately differentiated  | T <sub>4</sub> N <sub>1</sub> M <sub>1</sub> |
| 24         | 52  | Female | Lung        | Papillary mucinous adenocarcinoma                   | T <sub>4</sub> N <sub>1</sub> M <sub>x</sub> |

Tissues and pathological informations were obtained from Alenabio (Xian, China)

**Supplementary Table 5. Multiorgan metastasis of B16-F10 melanoma cells injected intravenously in C57 BL/6 and diabetic KK-Ay mice.**

| Group                        | Tissue classes |         |       |                     |             |        |
|------------------------------|----------------|---------|-------|---------------------|-------------|--------|
|                              | Mesentery      | Omentum | Lung  | Axillary Lymph Node | Mediastinum | Kidney |
| C57 BL/6 treated by Pep2-con | 0.00%          | 0.00%   | 33.3% | 0.00%               | 25.0%       | 0.00%  |
| C57 BL/6 treated by Pep2-A2  | 0.00%          | 0.00%   | 16.7% | 0.00%               | 25.00%      | 0.00%  |
| KK-Ay treated by Pep2-con    | 27.2%          | 27.2%   | 54.5% | 27.2%               | 9.09%       | 9.09%  |
| KK-Ay treated by Pep2-A2     | 18.1%          | 9.09%   | 0.00% | 0.00%               | 0.00%       | 0.00%  |

\*Each Value shows the percentage of multiorgan metastasis.

**Supplementary Table 6. All primary antibodies against the indicated proteins used in the present study are listed.**

| Antibody      | Provider                          | Host         | Dilution               |
|---------------|-----------------------------------|--------------|------------------------|
| HA-tag        | MBL (561)                         | Rabbit       | 1:1000 WB              |
| DDK-tag       | MBL (PM020, M185-3)               | Mouse/Rabbit | 1:1000 WB              |
| Myc-tag       | MBL (M047-3)                      | Mouse        | 1:1000 WB              |
| GFP-tag       | MBL (M048-3)                      | Mouse        | 1:1000 WB              |
| LC3           | Sigma (L7543)                     | Mouse        | 1:100 IF               |
| TRB3          | OriGene (TA303408)                | Rabbit       | 1:1000 WB<br>1:100 IHC |
| TRB3          | Abcam (ab88332)                   | Mouse        | 1:100 IF               |
| p62           | Sigma (P0067)                     | Rabbit       | 1:5000 WB              |
| p62           | Abcam (ab56416)                   | Rabbit       | 1:500 IF               |
| actin         | Cell Signaling Technology (12262) | Mouse        | 1:1000 WB              |
| beclin 1      | Cell Signaling Technology (3495)  | Rabbit       | 1:1000 WB              |
| p-Akt         | Cell Signaling Technology (9271)  | Rabbit       | 1:1000 WB              |
| Akt           | Cell Signaling Technology (4691)  | Rabbit       | 1:1000 WB              |
| mTOR          | Cell Signaling Technology (2972)  | Rabbit       | 1:1000 WB              |
| p-mTOR        | Cell Signaling Technology (2971)  | Rabbit       | 1:1000 WB              |
| PI3K p85      | Santa Cruz (sc-1637)              | Rabbit       | 1:1000 WB              |
| pPI3K p85     | Cell Signaling Technology (4228)  | Rabbit       | 1:1000 WB              |
| ERK           | Cell Signaling Technology (4695)  | Rabbit       | 1:1000 WB              |
| pERK          | Cell Signaling Technology (4370)  | Rabbit       | 1:1000 WB              |
| $\gamma$ H2AX | Cell Signaling Technology         | Rabbit       | 1:1000 WB              |

|                |                                   |        |                       |
|----------------|-----------------------------------|--------|-----------------------|
|                | (2577)                            |        |                       |
| HIF-1 $\alpha$ | Cell Signaling Technology (3716)  | Rabbit | 1:1000 WB             |
| PI3KC3         | Cell Signaling Technology (4263)  | Rabbit | 1:1000 WB             |
| C-Myc          | Cell Signaling Technology (sc-40) | Rabbit | 1:1000 WB             |
| COX2           | Cell Signaling Technology (12282) | Rabbit | 1:1000 WB             |
| EGFR           | Cell Signaling Technology (4267)  | Rabbit | 1:1000 WB             |
| MMP1           | Abcam (ab38929)                   | Rabbit | 1:1000 WB             |
| MMP2           | Abcam (ab110186)                  | Rabbit | 1:1000 WB             |
| MT-MMP         | Abcam (ab53712)                   | Rabbit | 1:1000 WB             |
| Ub             | Cell Signaling Technology (3936)  | Mouse  | 1:250 IF              |
| pTyr-100       | Cell Signaling Technology (9411)  | Mouse  | 1:1000 WB             |
| Snail          | Cell Signaling Technology (3879)  | Rabbit | 1:1000 WB             |
| Twist          | Abcam (ab49254)                   | Rabbit | 1:1000 WB             |
| pIRS-1         | Santa Cruz (sc-17196)             | goat   | 1:500 WB<br>1:100 IHC |
| IRS-1          | Cell Signaling Technology (2382)  | Rabbit | 1:1000 WB             |
